# Supplementary material
Source: HighWire-hosted journal article supplement (https://bmjopen.bmj.com/content/9/7/e027895)
Supplement: inline-supplementary-material-1 [file inline-supplementary-material-1.pdf]

## Appendix

Table A. Missing data for each variable

| Variables                        | China        |                   |         | US           |                   |         |
|----------------------------------|--------------|-------------------|---------|--------------|-------------------|---------|
|                                  | Total number | Number of missing | Percent | Total number | Number of missing | Percent |
| Self-rated health                | 5751         | 0                 | 0.00    | 10374        | 0                 | 0.00    |
| Age                              | 5730         | 21                | 0.37    | 10374        | 0                 | 0.00    |
| Sex                              | 5751         | 0                 | 0.00    | 10374        | 0                 | 0.00    |
| Marital status                   | 5751         | 0                 | 0.00    | 10374        | 0                 | 0.00    |
| Number of living children        | 5751         | 0                 | 0.00    | 10167        | 207               | 2.00    |
| Living arrangements              | 5751         | 0                 | 0.00    | 10374        | 0                 | 0.00    |
| Currently working                | 5623         | 128               | 2.23    | 10352        | 22                | 0.21    |
| Educational level                | 5746         | 5                 | 0.09    | 10370        | 4                 | 0.04    |
| ADLs                             | 5741         | 10                | 0.17    | 10364        | 10                | 0.10    |
| IADLs                            | 5743         | 8                 | 0.14    | 10364        | 10                | 0.10    |
| Self-reported memory             | 5699         | 52                | 0.90    | 9565         | 809               | 7.80    |
| Recall summary score             | 5451         | 300               | 5.22    | 9565         | 809               | 7.80    |
| Number of mental health problems | 5302         | 449               | 7.81    | 9450         | 924               | 8.91    |
| High blood pressure              | 5361         | 390               | 6.78    | 10347        | 27                | 0.26    |
| Diabetes                         | 5325         | 426               | 7.41    | 10348        | 26                | 0.25    |
| Cancer                           | 5361         | 390               | 6.78    | 10338        | 36                | 0.35    |
| Lung disease                     | 5371         | 380               | 6.61    | 10353        | 21                | 0.20    |
| Heart problem                    | 5348         | 403               | 7.01    | 10345        | 29                | 0.28    |
| Stroke                           | 5370         | 381               | 6.62    | 10352        | 22                | 0.21    |
| Psychiatric problems             | 5352         | 399               | 6.94    | 10350        | 24                | 0.23    |
| Arthritis                        | 5364         | 387               | 6.73    | 10351        | 23                | 0.22    |
| Ever drinking                    | 5740         | 11                | 0.19    | 10371        | 3                 | 0.03    |
| Ever smoking                     | 5746         | 5                 | 0.09    | 10288        | 86                | 0.83    |

Notes: ADLs: activities of daily living; IADLs: instrumental activities of daily living

Table B. Results of logistic regression models for variables violating proportional odds assumption in the US and China respectively

|                                       | <b>Model 1</b>       | <b>Model 2</b>       | <b>Model 3</b>       | <b>Model 4</b>       |
|---------------------------------------|----------------------|----------------------|----------------------|----------------------|
|                                       | <b>OR</b>            | <b>OR</b>            | <b>OR</b>            | <b>OR</b>            |
|                                       | <b>(95% CI)</b>      | <b>(95% CI)</b>      | <b>(95% CI)</b>      | <b>(95% CI)</b>      |
| <b>US</b>                             |                      |                      |                      |                      |
| Education                             |                      |                      |                      |                      |
| High-school                           | 0.86<br>(0.61, 1.20) | 1.01<br>(0.85, 1.21) | 1.50<br>(1.26, 1.79) | 1.13<br>(0.84, 1.50) |
| Some college or college and above     | 1.01<br>(0.73, 1.40) | 1.28<br>(1.07, 1.53) | 1.87<br>(1.56, 2.25) | 1.12<br>(0.82, 1.52) |
| Hypertension                          | 0.51<br>(0.41, 0.63) | 0.65<br>(0.57, 0.74) | 0.77<br>(0.66, 0.91) | 0.85<br>(0.64, 1.13) |
| Diabetes                              | 0.57<br>(0.41, 0.79) | 0.52<br>(0.45, 0.60) | 0.65<br>(0.56, 0.76) | 0.79<br>(0.61, 1.01) |
| Stroke                                | 0.60<br>(0.39, 0.92) | 0.73<br>(0.59, 0.91) | 0.81<br>(0.67, 0.99) | 0.53<br>(0.40, 0.72) |
| Arthritis                             | 0.50<br>(0.41, 0.62) | 0.62<br>(0.54, 0.70) | 0.74<br>(0.63, 0.87) | 0.71<br>(0.51, 1.00) |
| <b>China</b>                          |                      |                      |                      |                      |
| Education                             |                      |                      |                      |                      |
| Upper secondary & vocational training | 0.65<br>(0.14, 2.88) | 0.75<br>(0.46, 1.24) | 1.33<br>(0.68, 2.60) | 1.62<br>(0.99, 2.64) |
| Tertiary                              |                      | 0.42<br>(0.17, 1.05) | 1.19<br>(0.66, 2.13) | 0.97<br>(0.52, 1.78) |
| Hypertension                          | 0.76<br>(0.40, 1.48) | 0.72<br>(0.56, 0.91) | 0.74<br>(0.60, 0.91) | 0.75<br>(0.63, 0.90) |
| Diabetes                              | 1.32<br>(0.50, 3.48) | 0.76<br>(0.47, 1.22) | 0.67<br>(0.46, 0.98) | 0.96<br>(0.74, 1.25) |
| Stroke                                | 1.10<br>(0.20, 6.09) | 0.70<br>(0.33, 1.48) | 0.53<br>(0.31, 0.90) | 0.51<br>(0.35, 0.75) |
| Arthritis                             | 0.55<br>(0.30, 1.04) | 0.49<br>(0.38, 0.63) | 0.62<br>(0.50, 0.77) | 0.84<br>(0.70, 1.01) |

Notes:

1. Outcome variable in logistic regression models:

- Model 1: self-rated health (“excellent” vs. “very good”, “good”, “fair” and “poor”)
- Model 2: self-rated health (“excellent” and “very good” vs. “good”, “fair” and “poor”)
- Model 3: self-rated health (“excellent”, “very good”, and “good” vs. “fair” and “poor”)
- Model 4: self-rated health (“excellent”, “very good”, “good”, and “fair” vs. “poor”)

2. Because only 3 older adults with tertiary education level reported excellent health, the odds ratio was not estimated.

3. All models included sociodemographics (age, sex, educational level, currently working), family structure (living arrangements, number of children), functional limitations (ADLs and IADLs), cognition (self-reported memory, a total recall summary score), chronic conditions (high blood pressure, diabetes, cancer, lung disease, heart problem, stroke, psychiatric problems, and arthritis), mental health, and health-related behaviors (ever drinking and ever smoking).
